# Supplementary material for: A Broad-Based Mosquito Yeast Interfering RNA Pesticide Targeting Rbfox1 Represses Notch Signaling and Kills Both Larvae and Adult Mosquitoes
Source: Pathogens. 2021 Sep 28;10(10):1251. doi: 10.3390/pathogens10101251 (PMC8541554; doi:10.3390/pathogens10101251)
Supplement: Supplementary file 1 [file pathogens-10-01251-s001.zip › Table S1.pdf]

Table S1. Conservation of the Rbfox1.457 target site in mosquitoes.

| Species or Taxon Group           | Gene or Contig            |
|----------------------------------|---------------------------|
| <i>Aedes aegypti</i>             | AAEL019934                |
| <i>Aedes albopictus</i>          | LOC109398542/LOC109419707 |
| <i>Anopheles arabiensis</i>      | AARA017873                |
| <i>Anopheles christyi</i>        | KB698817                  |
| <i>Anopheles coluzzii</i>        | ACOM024690/ACON006089     |
| <i>Anopheles culicifacies</i>    | KI422895                  |
| <i>Anopheles dirus</i>           | ADIR008834                |
| <i>Anopheles epiroticus</i>      | AEPI000570                |
| <i>Anopheles funestus</i>        | AFUN020876                |
| <i>Anopheles maculatus</i>       | KI437899                  |
| <i>Anopheles gambiae</i>         | AGAP006089                |
| <i>Anopheles melas</i>           | KI920132                  |
| <i>Anopheles merus</i>           | LOC121593792              |
| <i>Anopheles minimus</i>         | AMIN009931                |
| <i>Anopheles quadriannulatus</i> | AQUA017390                |
| <i>Anopheles sinensis</i>        | KI916227                  |
| <i>Anopheles stephensi</i>       | LOC118510461              |
| <i>Culex pipiens pallens</i>     | LOC120425920              |
| <i>Culex quinquefasciatus</i>    | LOC6044582                |
| <i>Hermetia illucens</i>         | LOC119656183/LOC119647768 |
| <i>Lutzomyia longipalpis</i>     | LLOJ006090                |
| <i>Phlebotomus papatasi</i>      | JP545859.1                |
| Amphibians                       | None                      |
| Birds                            | None                      |
| Fish                             | None                      |
| Fungi                            | None                      |
| Human                            | None                      |
| Mammals                          | None                      |
| Plants                           | None                      |
| Reptiles                         | None                      |
